# Supplementary material for: Independent Losses of Visual Perception Genes Gja10 and Rbp3 in Echolocating Bats (Order: Chiroptera)
Source: PubMed Central journal article supplement (PMC3715546; doi:10.1371/journal.pone.0068867), 2013-07-18

(A) *Gja10*

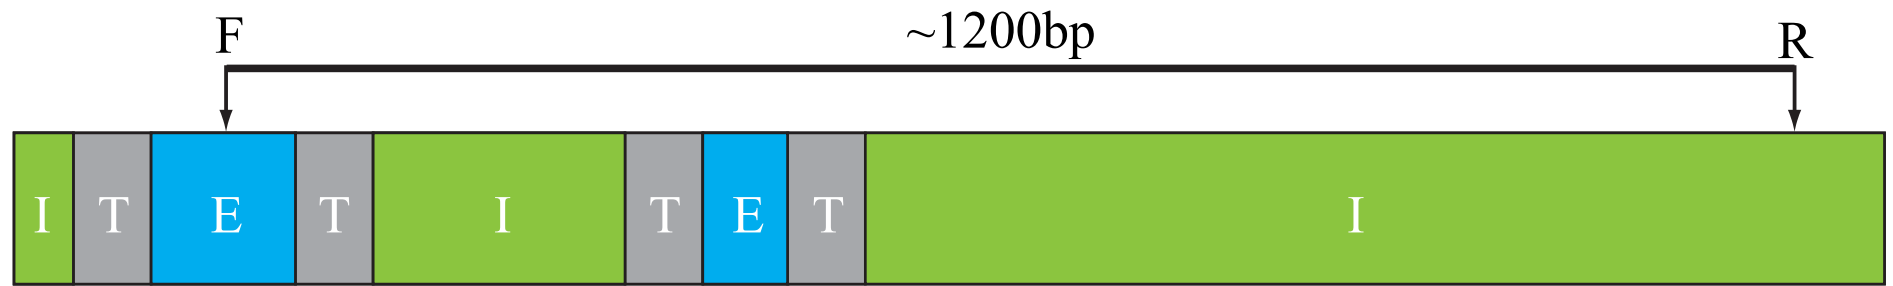

(B) *Rbp3*

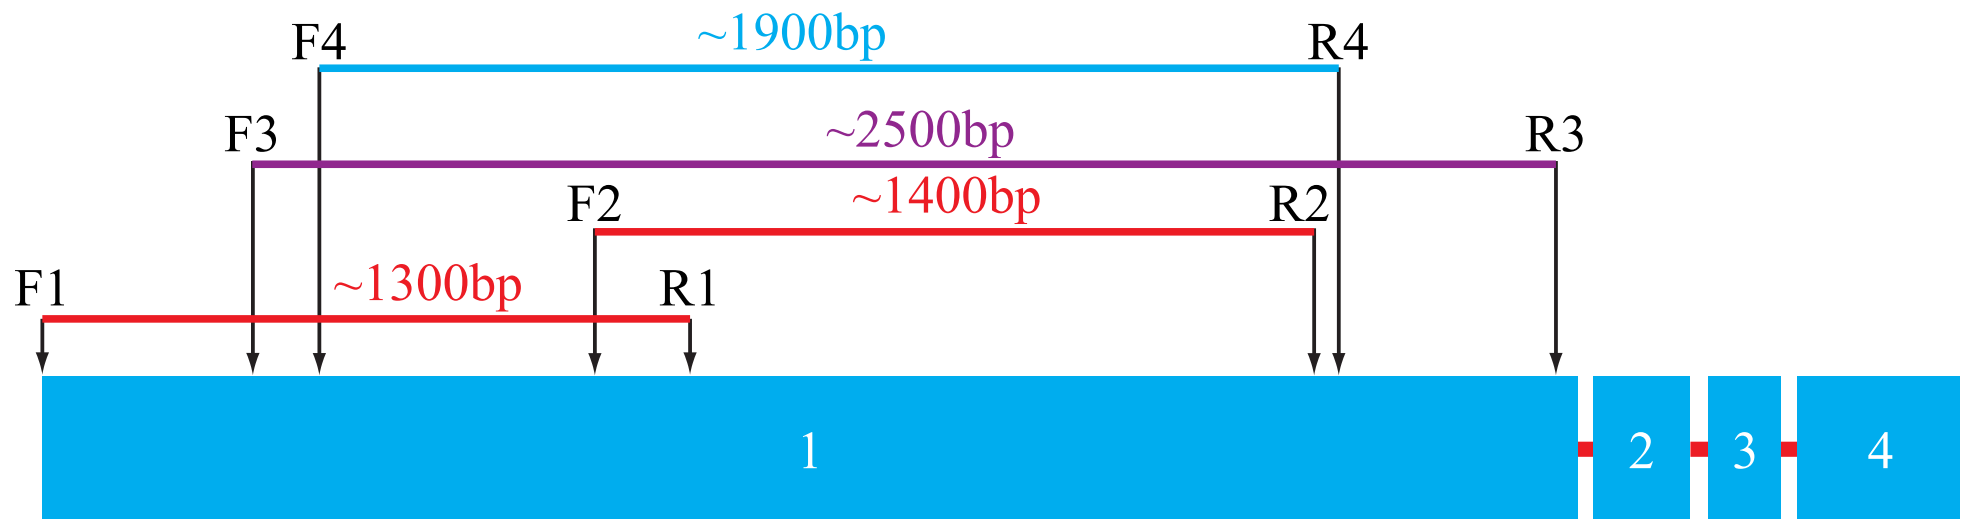

Supplement: pone.0068867.s001.pdf [file pone.0068867.s001.pdf]
