# Supplementary material for: Independent Losses of Visual Perception Genes Gja10 and Rbp3 in Echolocating Bats (Order: Chiroptera)
Source: PubMed Central journal article supplement (PMC3715546; doi:10.1371/journal.pone.0068867), 2013-07-18
Supplement: pone.0068867.s002.pdf [file pone.0068867.s002.pdf]

|                         |            |           |            |            |            |              |                                |                       |            |                           |                          |               |                  |             |            |            |       |
|-------------------------|------------|-----------|------------|------------|------------|--------------|--------------------------------|-----------------------|------------|---------------------------|--------------------------|---------------|------------------|-------------|------------|------------|-------|
| mouse                   | AATATCCTGG | AAATATTTC | TCTCGGCATC | AGGAAAATCA | TGAGGGCACT | CGATGGCAAA   | TCCAGCAGTG                     | GGAACACTGA            | GAACGAAACA | GGCCCTCCAT                | TCCATTCAAC               | AAAC-TACTC    | AGGGACCCAG       | CAGTGTATGA  | TCTGTTCTTC | TTT-ACCTGA | [640] |
| <i>R. pearsonii</i>     | G. A. AA   | C         | G. A.      | A.         |            | TT. C. AG. G | G. A. GG. TG.                  | G. T. TG              |            |                           | TG. A. A-                | T. T. T. CTG. | G. T. CA. CC.    | C. -GT.     |            |            | [640] |
| <i>R. ferrumequinum</i> | AA         | G. A. A.  | G. A.      | A.         |            | TT. C. AG. G | G. A. GG. TG.                  | G. TGA                | G          |                           | TG. A. A-                | T. T. CTG.    | TAG              | T. CA. CC.  | C. -GT.    |            | [640] |
| <i>R. sinicus</i>       | G. A. A.   |           | G. A.      | A.         |            | TT. C. AG. G | G. A. GG. TG.                  | G. T. G               |            |                           | TG. A. A-                | T. T. CTG.    | G. T. CA. CC.    | C. -GT.     |            |            | [640] |
| <i>R. affinis</i>       | G. A. A.   |           | G. A.      | A.         |            | TT. C. AG. G | G. A. GG. TG.                  | G. T. G               |            |                           | TG. A. A-                | T. T. CAG.    | G. T. CA. CC.    | C. -GT.     |            |            | [640] |
| <i>R. pusillus</i>      | G. A. A.   |           | G. A.      | A.         |            | TT. C. AG. G | G. A. GG. TG.                  | G. T. G               |            | A.                        | TG. A. A-                | T. T. CTG.    | C. G. T. CA. CC. | C. -GT.     |            |            | [640] |
| <i>H. armiger</i>       | G. A. A.   |           | G. A.      | A.         |            | TT. TGA      | G. TGA                         | AG                    |            |                           | TG. A. A-                | T. T. CT.     | T. CA. CC.       | C. TGT.     |            |            | [640] |
| <i>H. pratti</i>        | G. A. A.   | G         | G. A.      | A.         |            | TT. TGA      | G. TGA                         | AC                    |            |                           | TG. A. A-                | T. T. CT.     | T. CA. CC.       | C. TGT.     |            |            | [640] |
| <i>H. pomona</i>        | AA         | G. A. A.  | G. A.      | A.         |            | TT. TGA      | G. TGA                         | AG                    |            |                           | TG. A. A-                | T. T. CT.     | T. CA. CC.       | C. -GT.     |            |            | [640] |
| <i>H. cineraceus</i>    | G. A. TAG  |           | G. A.      | A.         |            | T. TGA       | T. T. AG. G                    | G. A. GG. T. G. T. AG |            |                           | TGAA                     | AA            | T. T. CT.        | T. CA. CC.  | C. -GT.    |            | [640] |
| <i>A. stoliczkanus</i>  | G. A. A.   | C.        | C. G. A.   |            | A. GT.     | TT. AG. G    | G. G. A. GG. T. G. T. AG       |                       |            |                           | TG. A. A-                | T. T. CT.     | A. T. CA. CC.    | C. -GT.     |            |            | [640] |
| <i>D. rotundus</i>      | G. A. A.   | C.        | T. A.      |            |            | TT. A. G     | AG. A. A. GG. T. G. T. GG      |                       |            | G. T. TG. A. A-           | T. T. C.                 |               | T. C. CC.        | C. -GT.     |            |            | [640] |
| <i>M. ricketti</i>      | G. A. A.   | C.        | G. A.      |            | G.         | TT. AG. G    | A. A. A. GG. T. CG. T. GG      |                       |            | C. T. TGA                 | A- T. T. C. T.           | A. TGA        | T. C. CC.        | C. -GT.     |            |            | [640] |
| <i>M. leucogaster</i>   | G. A. ATAA | CC.       | G. A.      | AA.        | G. A. T.   | TT. AG. G    | A. A. A. G. T. CG. T. GG       |                       |            | C. T. TG. G. A- T. TACTT. | A. T. C. CC.             | C. -GT.       |                  |             |            |            | [640] |
| <i>S. kuhlii</i>        | AA         | G. A. A.  | C.         | GG. AA.    | TA. G.     | G. T. TGA    | AG. ATGA                       | GG. TGA               | CG. TGA    | GG                        | C. T. TG. G. A- T. T. C. |               | A. G. T. C. CC.  | G. -GT. TGA |            |            | [640] |
| <i>M. fuliginosus</i>   | G. A. A.   | C.        | G. A.      |            | G.         | TT. AG. G    | C. TG. AG. A. GG. T. AG. T. GG |                       |            | A. T. T. CG. A- T. T. T.  |                          |               | A. T. C. CC.     | C. -G.      |            |            | [640] |

|                         |            |            |             |              |              |                        |                       |             |            |            |            |                        |                     |                            |                         |            |       |
|-------------------------|------------|------------|-------------|--------------|--------------|------------------------|-----------------------|-------------|------------|------------|------------|------------------------|---------------------|----------------------------|-------------------------|------------|-------|
| mouse                   | AAGAATCTCA | CTACTTCAAG | CCAACAATAA  | ACAGCAAGTC   | ATCCGAGTCA   | ATATAACCAG             | GTCTAAAAGC            | ATGTGGCAAA  | TTCCACACCC | CAGGCAACTT | GAGGTAGATG | TATCTGTGG              | CAAAAGAGAC          | TGGGCTGAGA                 | AAATTGAGAG              | CTGTGCACAG | [800] |
| <i>R. pearsonii</i>     | T          | G. A.      | TAA         | C.           | G.           | G. GT. AA              | CT                    | T. G. C. G. | C. CA      |            | CC         | CT. G. C. CA.          | T. GG. A.           |                            | GGA. C. CA. A. C. G.    | [800]      |       |
| <i>R. ferrumequinum</i> | T          | G. A.      | TAA         |              | G.           | G. G. AA               | CT                    | T. C. G.    | C. CA      |            | CC         | CT. G. C. CA.          | T. GG. A.           |                            | GGA. C. CA. A. G.       | [800]      |       |
| <i>R. sinicus</i>       | T          | G. TAA     | T.          |              | G.           | G. G. AA               | CT                    | T. C. GT.   | CA         |            | TAG        | CC                     | CT. G. C. CA.       | T. GG. A.                  | AA. GGA. C. CA. A. G.   | [800]      |       |
| <i>R. affinis</i>       | T          | G. TAA     | G. T.       |              | G.           | G. G. AA               | CT                    | T. C. GT.   | CA         |            | TAG        | CC                     | CT. G. C. CA.       | T. GG. A.                  | GGA. C. CA. A. G.       | [800]      |       |
| <i>R. pusillus</i>      | T          | A.         | TAA         |              | G.           | G. G. AA               | CT                    | T. C. G.    | CG         |            | AC. CC     | CT. C. CA.             | T. GG. A. C.        |                            | GGA. C. CA. A. G.       | [800]      |       |
| <i>H. armiger</i>       | T          | TGAC       | C.          |              | G. G. AA     | A. C. T. T. CT. G. GT. |                       |             |            |            | TAG        | CC                     | CT. G. CT. T. G. A. |                            | GGA. C. CA. A. G.       | [800]      |       |
| <i>H. pratti</i>        | T          | TGAC       | C.          |              | G. G. AA     | A. C. T. T. CT. G. G.  |                       |             |            |            | TAG        | CC                     | CT. G. CT. T. G. A. |                            | GGA. C. CA. A. G.       | [800]      |       |
| <i>H. pomona</i>        | T          | G. AC.     | G. C.       |              | G. G. AA     | C. T. T. CT. G.        |                       |             |            |            | CC         | CT. G. CA.             | T. G. A.            |                            | GGA. C. CA. A. G.       | [800]      |       |
| <i>H. cineraceus</i>    | T          | G. AC.     | G. C.       |              | G. G. AA     | C. T. T. CT. G.        |                       |             |            |            | CC         | CT. G. CA.             | T. G. A.            |                            | GGA. C. CA. A. G.       | [800]      |       |
| <i>A. stoliczkanus</i>  | T          | G. A.      | C.          | A.           |              | G. G. AA               | C. T. C. T. G.        |             |            |            | CC         | CT. G. A. CA.          | T. G. A.            |                            | GGA. C. CA. A. G.       | [800]      |       |
| <i>D. rotundus</i>      | T          | G. C.      | T. C. G. A. | G. C. AG. G. | C. G. G. GAA | C. T. C. GA.           |                       |             |            |            | CA         | CTGG. G.               | T. AT.              |                            | GGA. C. A. C. G.        | [800]      |       |
| <i>M. ricketti</i>      |            |            | C. G. A.    | A.           | G. G. G. AA  | TAA                    | GC. T. A. A. C. TGA   |             |            |            | C          | CT. GTG. TAG           | TGA                 | AG. TGA                    | G. GGG. C. CA. A. C. G. | [800]      |       |
| <i>M. leucogaster</i>   | T          |            | C. G. A. A. | A.           | G. G. G. AA  | C. T. C. A. A. C.      |                       |             |            |            | C          | CT. G. A. A. T. G. AG. |                     |                            | GGG. C. CA. A. G.       | [800]      |       |
| <i>S. kuhlii</i>        | A. T       |            | C. G. A.    | A.           | G. G. G. A   | C. CT                  | T. A. C. A. A. T. TGA |             |            |            | T. G. C    | CTG. C. T. AG.         |                     | C. G. GGG. C. CA. A. C. G. | [800]                   |            |       |
| <i>M. fuliginosus</i>   | T          |            | CC. GA. A.  | A.           | G. G. GAA    | C. T. G. C. G. G.      |                       |             |            |            | CC         | CT. G. G. A. T. AT.    |                     |                            | GGA. C. CA. A. C. G.    | [800]      |       |

|                         |            |                   |               |            |            |                   |                                        |                                   |            |            |                           |                               |                                |            |            |            |       |
|-------------------------|------------|-------------------|---------------|------------|------------|-------------------|----------------------------------------|-----------------------------------|------------|------------|---------------------------|-------------------------------|--------------------------------|------------|------------|------------|-------|
| mouse                   | CTCCACGTCC | ACAGCCCTG         | CCCACATGAC    | CGCAGTGCCA | GAATTCAGCA | CCCTGGACAG        | CAACCGTGCC                             | ATTCTGTCTT                        | TGGCCCCAAG | AATGCAATGT | CTCAGTCTTG                | GTTCCGGTAC-                   | AATGACGGCT                     | TCTCAACACC | GTCCATCAT- | CTGCGTTAGA | [960] |
| <i>R. pearsonii</i>     | T.         | A. GT. CTGG. T    | GA. T. T. T.  | TG.        | G. TAGA.   | CTC.              | TA. CA. GA. G. C.                      |                                   |            |            | C. A. C. G. CA. T.        | C. ACG. T. GC. T. - A. AA. G  |                                |            |            | [960]      |       |
| <i>R. ferrumequinum</i> | T.         | TG. GT. CTGG. T   | GA. T. T. T.  | G.         | G. AGA.    | CTC.              | TAA                                    | CA. GA. C. CACT.                  |            |            | TAGC. G. -                |                               | C. ACGT. T. GC. T. - A. AATAGG |            |            | [960]      |       |
| <i>R. sinicus</i>       | T.         | A. GT. CTGG. T    | GA. T. T. T.  | AG.        | G. AGA.    | CTC.              | TA. CA. GA. G. C.                      |                                   |            |            | A. A. G. - CA. T.         | C. ATG. T. TGC. T. - A. AA. G |                                |            |            | [960]      |       |
| <i>R. affinis</i>       | T.         | A. GT. CTGG. T    | GA. T. T. T.  | TG.        | G. AGA.    | CTC.              | TAA                                    | CA. G. GA. G. C. CA. T.           |            |            | TAGC. G. -                |                               | C. ACG. T. TGC. T. - A. AATAGG |            |            | [960]      |       |
| <i>R. pusillus</i>      | TAC.       | A. GT. TGG. T     | GA. T. T. T.  | T.         | G. AGA.    | CTC.              | TAA                                    | CA. GA. G. C. CA. T.              |            |            | TAGC. G. -                |                               | C. ATG. T. GC. T. - A. AATAGG  |            |            | [960]      |       |
| <i>H. armiger</i>       | T.         | A. A. T. CT. G. T | GA. T. T. T.  | TG.        | G. AGA.    | CTC.              | TAC. A. A. C.                          |                                   |            |            | CGA. G. - CA. T.          | C. AGG. G. A. TC- A. AATAGG   |                                |            |            | [960]      |       |
| <i>H. pratti</i>        | T.         | A. A. T. CT. G. T | GA. T. T. T.  | TG.        | G. AGA.    | CTC.              | TAC. A. A. C.                          |                                   |            |            | CGA. G. - CA. T.          | C. AGG. G. A. TC- A. AATAGG   |                                |            |            | [960]      |       |
| <i>H. pomona</i>        | T.         | T. G. A. T. CTGG. | T. T. T.      | TG.        | G. AGA.    | CTC.              | C. TAC. A. CA. C. G.                   |                                   |            |            | CGA. - CA. T.             | G. AGG. T. T. AA. G           |                                |            |            | [960]      |       |
| <i>H. cineraceus</i>    | T.         | T. G. A. T. CTGG. | T. T. T.      | TG.        | G. AGA.    | CTC.              | C. TAC. A. CA. C. C.                   |                                   |            |            | CGA. - CA. T.             | G. AGG. T. T. AA. G           |                                |            |            | [960]      |       |
| <i>A. stoliczkanus</i>  | CT.        | A. T. CTGG. A     | GA. T. T. GT. | TG.        | AG. AGA.   | CTC.              | TAC. A. A. C. C. A. G. - CA. G.        |                                   |            |            | C. A. G. - CA. G.         | C. AGG. T. T. AA. G           |                                |            |            | [960]      |       |
| <i>D. rotundus</i>      | AC.        | C. ATGA           | CTGGA. A      | GA. T. CA. | G.         | AGA.              | TCTCT. GGTAC. GT.                      |                                   |            |            | C. C. C. A. C. T- GGC. T. | C. GA. G. T. C. - A. AA. G    |                                |            |            | [960]      |       |
| <i>M. ricketti</i>      | T.         | A. A. T. CAGG.    | TGA. G. TGA   | G.         | TGA        | TC.               | ATAC. A. C. C. AC. C. A. C. - G. T. C. |                                   |            |            | TAG                       | TT. T. C. - A. AA. G          |                                |            |            | [960]      |       |
| <i>M. leucogaster</i>   | G.         | A. T. CTGG. T     | GA. T. T.     | G.         | AGA.       | AC. A. A. ATAC. A | G. A. C. A. C. AC. C. T. C. - T. C.    |                                   |            |            |                           | C. AG. T. TT. C. - A. AATAGG  |                                |            |            | [960]      |       |
| <i>S. kuhlii</i>        | T. C. T.   | AA. T. CTGG. T    | GA. T. T.     | A. TG.     | G. AGA.    | T. TG.            | CCC                                    | G. A. ACC. A. C. A. C. - G. T. C. |            |            |                           | C. TAG                        | T. C. A. AATAGG                |            |            | [960]      |       |
| <i>M. fuliginosus</i>   | TTC.       | TG. T. TTGG.      | GA. T. A. A.  | G.         | T. AG.     | CTC.              | TGC. C. CA. C. C. A. - GC. T. C.       |                                   |            |            |                           | C. AGG. TT. CC- A. CA. CAG    |                                |            |            | [960]      |       |

|                         |            |            |             |            |            |             |            |            |           |            |             |              |            |            |               |            |        |
|-------------------------|------------|------------|-------------|------------|------------|-------------|------------|------------|-----------|------------|-------------|--------------|------------|------------|---------------|------------|--------|
| mouse                   | AACCTGGGAG | CGATCCCAGG | GCCCAGAAGC  | TTCAGGGAGA | TCTCTCACAG | ATCGCCAGAG  | TCACTTCCAA | GGCAGTGACG | GCAGTGAAG | AGAGAGTGGG | GTTTGGACAG  | ACAGATTAGG   | CCCAGGAAGT | CGCAAGGCCA | GCTTCTATC     | GAGGCTGATG | [1120] |
| <i>R. pearsonii</i>     | G.....     | AAG..T...  | A..TGCC.C.  | C...A.GAG  | C...T...C  | ..TTG..C..  | ...G.AG.   | AA...C..T. | ...CATG.. | .....      | ..C.....    | ...CTC..     | ..TTG..C.. | .....      | ..G...C..     | ..AT..C..  | [1120] |
| <i>R. ferrumequinum</i> | .G.....    | AAG..T...  | A..TGCC.C.  | C...A.GAG  | C...T...C  | ..TTG..C..  | ...G.AG.   | AA...C..T. | ...CATGA  | .....      | ..C.....    | ...CTCA..    | ..TTG..C.. | .....      | ..G...C..     | ..T...C..  | [1120] |
| <i>R. sinicus</i>       | G.....     | AAG..T...  | A..TGCC.C.  | C...A.GAG  | C...T...C  | ..TTG..C..  | ...G.AG.   | AA...C..T. | ...CATG.. | .....      | ..C.....    | ...GTCA..    | ..TTG..C.. | .....      | ..G...C..     | ..AG..C..  | [1120] |
| <i>R. affinis</i>       | G.....     | AAG.AT...  | A..TGCC.C.  | C...A.GA.  | C...T...C  | ..TTG..C..  | ...G.AG.   | AA...C..T. | ...CATGA  | .....      | ..C.....    | ...GTC..     | ..TTG.AC.. | .....      | ..GG..C..     | ..AG..C..  | [1120] |
| <i>R. pusillus</i>      | G.....     | AAG..T...  | A..TGC..C.  | C...AT.AG  | C...T...C  | ..TTG..C..  | ...G.AG.   | AA...C..T. | ...CATGA  | .....      | ..C.....    | ...CTC..     | ..TTG..C.. | .....      | ..G...C..     | ..AG..C..  | [1120] |
| <i>H. armiger</i>       | .G.....    | AAG.....   | A..TGCC.C.  | C...A.GAG  | C...T...C  | ..CTTG..C.  | ...G.AG.   | AA...C..T. | ..C.TGA   | ..C.....   | ..A.C.....  | ...CTC..     | ..ATG..T.. | .....      | ..G...T..     | ..ATG..C.. | [1120] |
| <i>H. pratti</i>        | .G.....    | AAG.....   | A..TGCC.C.  | C...A.GAT  | C...T...C  | ..CTTG..C.  | ...G.AG.   | AA...C..T. | ..C.TGA   | ====       | ..A.C.....  | ...CTC..     | ..GTG..TAG | .....      | ..G...TAG     | ..ATG..C.. | [1120] |
| <i>H. pomona</i>        | .....      | AAGC.....  | A..TGCC.C.  | C...A.AG   | CT...T...  | ..CGTG..C.  | ...G.AG.   | AA...CA.T. | ..C.TG..  | .....      | ..ACC..G.G. | ...CTC..     | ..GTG..T.. | .....      | ..G...T.AA..  | ..T...T..  | [1120] |
| <i>H. cineraceus</i>    | .....      | AAGC.....  | A..TGCC.C.  | C...A.GAG  | CT...T...  | ..CGTG..C.  | ...G.AG.   | AA...CA.T. | ..C.TG..  | ..C.....   | ..ACC.....  | ...CTCA..    | ..GTG..T.. | .....      | ..G...T.AAT.. | ..T...T..  | [1120] |
| <i>A. stoliczkanus</i>  | .....      | AAG.....   | A..TGCC.C.  | C...A.GAG  | CA...T...  | ..TTG..T..  | ...G.AG.   | AA...T...  | ..C.TG..  | ..C.....   | ..A.C.....  | ..G.A..CTC.. | ..GTG..C.. | .....      | ..T...G...T.. | ..AT..C..  | [1120] |
| <i>D. rotundus</i>      | .....G.    | AG.....    | A..TTTC.GC. | C...GAG    | C.....     | ..TTG..C..  | ...CG.AG.  | A...CA.T.  | ..CCTG..  | .....      | ..C.....    | ...CCTC..    | ..T.G..C.. | ..AA.....  | ..G...C..     | ..AT..C..  | [1120] |
| <i>M. ricketti</i>      | .....A     | AG...E...  | A..TGGC..CG | CG...EAG   | C.....     | ..G.TTG..C. | ...G.AG.   | .....C..T. | ..C.TGA   | .....      | ..A.....    | ...CTC..     | ..T.G..C.. | .....      | ..G...G...C.. | ..C...C.A  | [1120] |
| <i>M. leucogaster</i>   | .....      | AG.....    | A..TGGC..CG | C...GAG    | C...CT...  | ..G.TTG..C. | ...G.AG.   | .....C..T. | ..C.TGA   | ====       | ..A.....    | ...CTC..     | ..TTG..C.. | .....      | ..G...G...C.. | ..C...C.A  | [1120] |
| <i>S. kuhlii</i>        | .....      | AG.....    | A..TGGC..CG | C...GAG    | C...E...   | ..TTG..C..  | ...GTAGG   | .....T...  | ..TG..    | ====       | ..A.CT...AG | ...CTC..     | ====       | .....      | ..C...G...C.. | ..C...C.A  | [1120] |
| <i>M. fuliginosus</i>   | .....      | AG.....    | ATTGTC..C.  | C...GAG    | CT...T...  | ..TTG..C..  | ...G.AG.   | A...CA.T.  | ..C.TGC.. | ..G.....   | .....       | ...CTT..     | ..T.G..C.. | .....      | ..G...G...C.. | ..AT..C..  | [1120] |

|                         |            |             |            |            |                |                  |              |              |             |              |            |           |        |
|-------------------------|------------|-------------|------------|------------|----------------|------------------|--------------|--------------|-------------|--------------|------------|-----------|--------|
| mouse                   | TCAGAAAAGG | GACAACGGC   | --ATAGTGAC | TCAGGAAGCT | CACGGTCTCT     | GAATAGTTCC       | TGCTTGGATT   | TTTCACACGG   | AGAAAATAGC  | CCATCACCTC   | TGCCGTCTGC | C         | [1231] |
| <i>R. pearsonii</i>     | ..TGA      | ..T..G.T.   | ..TGC..TGA | .....      | ..CA.T...G     | ..G.TAGC..T      | .....        | ..C..C.T...C | ..G...C..   | ..C...T..    | ...T..AT.. |           | [1231] |
| <i>R. ferrumequinum</i> | ..T.G.     | ..T..G.T.   | ..C...     | .....      | ..CA.T...G     | ..G...C..T       | ..G...T.GC.  | ..C.T...C    | ..G...C..   | ..T.C...T..  | ...T..AT.. |           | [1231] |
| <i>R. sinicus</i>       | ..TGA      | ..T..G.T.   | ..C..TGA   | .....      | ..CA.C...G     | ..G.TAGC..T      | ..T...C..    | ..C.T...C    | ..G...C..   | ..C...T..    | ...T..AT.. |           | [1231] |
| <i>R. affinis</i>       | ..T.G.     | ..T..G.T.   | ..C...     | .....      | ..CACT...G     | ..G...C..T       | .....        | ..C..C.T...C | ..G...C..   | ..C...T..    | ...T..AT.. |           | [1231] |
| <i>R. pusillus</i>      | ..T.G..C.  | ..T..G.T.   | ..C...     | .....      | ..CA.T.T..G    | ..G...C..T       | .....        | ..C..C.T...C | ..G...C..   | ..C...T..    | ...T..AT.. |           | [1231] |
| <i>H. armiger</i>       | ..T.G.     | ..G.A.      | ..C...     | .....      | ..CA.T.T..G    | ..C...T          | ..G...C..    | ..C.G...CT   | ..G...C..   | ..C...TC..   | ...T..A..  |           | [1231] |
| <i>H. pratti</i>        | ..TGA      | ..G.A.      | ..C..TGA   | .....      | ..CA.T.T..G    | ..C.TAGC..T      | ..G...C..    | ..C.G...CT   | ..G...C..   | ..C...TC..   | ...T..A..  |           | [1231] |
| <i>H. pomona</i>        | ..T.G.     | ..GTT.      | ..C...T    | ..A.....   | ..CA.T..AG     | ..A...C..T       | ..G.A...CA   | ..C.G...C    | ..G...C..T  | ..C...TC..   | ...T..A..  |           | [1231] |
| <i>H. cineraceus</i>    | ..TC.G.    | ..GTT.      | ..C...T    | ..A.....   | ..CA.T..AG     | ..A...C..T       | ..G.A..A..CA | ..C.G...C    | ..G...C..T  | ..C...TC..   | ...T..G..  |           | [1231] |
| <i>A. stoliczkanus</i>  | ..T.G..A.  | ..TAG.T.    | ..C...     | .....      | ..TA.T...A     | ..C...C..T       | ..G...C..    | ..C.G...C    | ..G...C..   | ..G.C...TC.. | ...GT..A.T |           | [1231] |
| <i>D. rotundus</i>      | ..T...A.   | ..G.GTTT.   | ..C..CA.   | .....      | ..CA.TA...A    | ..C...C..T       | ..A..C..     | ..C.C...CA   | ..G...C..   | ..C...T..    | ...T..A..  |           | [1231] |
| <i>M. ricketti</i>      | ..T...     | ..G.TA.     | ..GC...    | .....      | ..T...TCA.     | ..T...G..C..C.TG | ====         | ..CTG..TCA   | ..GT...C..  | ..C.TG..T    | ...T..A..A |           | [1231] |
| <i>M. leucogaster</i>   | ..TGA      | ..A...G.TA. | ..C..TGA   | .....      | ..ATAGC.       | ..TCA.T...A      | ..CTAGC..G   | .....        | ..CTG..TCA  | ..GT...GC..  | ..CGTG..T  | ...T..A.. | [1231] |
| <i>S. kuhlii</i>        | ..T...     | ..G.T.      | ..G...     | .....      | ..T...TCA.     | ..T...G..C..C.A  | ====         | .....        | ..CTG..CTCA | ..GT...G...  | ..C.TGTT   | ...T..A.. | [1231] |
| <i>M. fuliginosus</i>   | ..T...     | ..G.T.      | ..C...     | .....      | ..T...CA.T...A | .....            | ..GC..       | ..CTG...CA   | ..GTAA      | .....        | ..C.TG..T  | ...T..A.. | [1231] |

Deletions

Insertions

Premature stop codons
