# Supplementary material for: Independent Losses of Visual Perception Genes Gja10 and Rbp3 in Echolocating Bats (Order: Chiroptera)
Source: PubMed Central journal article supplement (PMC3715546; doi:10.1371/journal.pone.0068867), 2013-07-18
Supplement: pone.0068867.s003.pdf [file pone.0068867.s003.pdf]

mouse CT--GAGACT GGGCCTAATG AGTCCCAGC AGCCACCCCC GAGGTGCCCA CGGAAGAAGA TGCCCGGAGG GCCCTGGTGG ACTCTGTGTT TCAGGTGTCC GTGCTGCCGG GCAATGTGGG CTACCTGC GC TTTGATAGAT TTGACAGCGC CGCTGTGCTG [800]  
*R. pearsonii* .G---. . . . . AA. CG. . . . . AC. . . . . A G. TGG. . G. A . . . . . GG A. . T. . G. C A . . . . . CA. . . . . C. A. . C. G. . . . . G . . . . . C. T. . . . . T . . . . . C. C. G. . . . . C. . . . . T. C. . . . . [800]  
*R. sinicus* .G---. . . . . AA. CG. . . . . AC. . . . . A G. TGG. . G. A . . . . . AG A. . T. . G. T A . . . . . CA. . . . . C. A. . C. A. . . . . G . . . . . T. . . . . T . . . . . C. C. G. . . . . C. . . . . T. CA. . . . . [800]  
*R. pusillus* .A---. . . . . AA. AG. . . . . AC. . . . . A G. TGG. . G. A . . . . . GG A. . GT. . G. T A . . . . . CA. . . . . C. A. . C. . . . . G . . . . . T. . . . . T . . . . . CC. C. G. . . . . C. . . . . T. C. . . . . [800]  
*R. luctus* .G---. . . . . T. . . . . AA. CG. . . . . AC. . . . . A G. . GG. . G. A . . . . . GG A. . T. . G. T A . . . . . CA. . . . . C. A. . G. . . . . A . . . . . C. T. . . . . T . . . . . C. G. . . . . C. . . . . T. C. . . . . [800]  
*H. armiger* AAT. . T. . . . . AG. C. . . . . C. . . . . A GT. AG. . . . . A . . . . . AGG A. . T. . G. T AG. G. CA. . . . . C. . . . . C. . . . . A . . . . . G. . . . . T . . . . . C. G. . . . . C. T. . . . . TTG. . . . . [800]  
*H. pratti* A---. . T. . . . . AG. C. . . . . C. . . . . A GT. AG. . . . . A . . . . . GG A. . T. . G. T AG. G. CA. . . . . C. . . . . C. . . . . A . . . . . G. . . . . TGA. . . . . T . . . . . C. G. . . . . C. . . . . TTTG. . . . . [800]  
*P. davyi* ---. . G. . . . . AG. C. . . . . CCT. . . . . A G. TTG. . . . . A . . . . . CA. C. AG AA. T. . G. T . T. T. CA. . . . . T. C. . . . . CA. . . . . C. C. . . . . A . . . . . T. . . . . C. . . . . A. T. T. . . . . T. . . . . [800]  
*P. parnellii* ---. . G. . . . . AG. C. . . . . CCT. . . . . A . . . . . TTG. . . . . A . . . . . CA. C. AG A. . T. . G. T . T. T. CA. . . . . T. . . . . CA. . . . . C. T. . . . . G . . . . . C. . . . . A. T. T. . . . . T. . . . . [800]  
*P. abramus* ---. . C. . . . . G. GCA GCC. . . . . G GTGT. . . . . A . . . . . AGG A. . T. . T. T. T. C. . . . . A . . . . . TAG. . . . . C. G. . . . . T . . . . . T. . . . . C. C. . . . . T . . . . . G. GCCTC. . . . . CA. G. . . . . T. . . . . [800]

mouse GAGACGCTGG GCCCTTACGT GCTGAAGCAG GTATGGGAGC CTTTGCAGGA CACGGAACAC CTCATCATGG ACCTGCGTCA TAACCCTG--GGGGT-CCG TCCTCGGCGA TGCCCTGTGGT GCTGTCTTAC TTCCAGGGAC CTGAGGCCGG ACCTGTACGG [960]  
*R. pearsonii* TG. GT. . . . . G. . . . . A. C. . . . . CGC. . . . . G. . . . . CC. . . . . G. . . . . T. . . . . C. G. . . . . C. . . . . G. . . . . T. . . . . T. AG . . . . . C. C. . . . . GT. . . . . C. . . . . A. C. A. . . . . C. C. G. AT [960]  
*R. sinicus* .G. GT. . . . . G. . . . . A. C. . . . . CGC. . . . . G. . . . . CC. . . . . G. . . . . T. . . . . C. G. . . . . C. . . . . G. . . . . TGA. . . . . C. C. . . . . T. . . . . C. A. C. A. . . . . C. C. G. AT [960]  
*R. pusillus* .G. GT. . . . . G. . . . . A. C. . . . . CGC. . . . . G. . . . . CC. . . . . G. . . . . T. . . . . C. G. . . . . C. . . . . G. . . . . A . . . . . T. AG . . . . . C. C. . . . . TGA. . . . . C. A. C. A. . . . . T. C. G. AT [960]  
*R. luctus* .GTGT. . . . . G. . . . . A. C. . . . . TGC. . . . . G. . . . . CC. . . . . G. . . . . T. . . . . AC. G. . . . . G. . . . . T. . . . . A . . . . . AC. T. AG . . . . . C. . . . . T. . . . . C. A. C. A. . . . . C. C. AG. AT [960]  
*H. armiger* .G. GT. . . . . GA. . . . . C. CTCAC. CT. . . . . G. A. . . . . CC. . . . . T. . . . . G. . . . . TAA. . . . . AC. G. TT. . . . . G. . . . . C. . . . . C. AG TG. C. . . . . T. . . . . C. A. T. T. A. C. . . . . G. TT [960]  
*H. pratti* .G. G. . . . . GA. . . . . A. CTCAC. C. . . . . G. A. . . . . CC. . . . . G. . . . . TAA. . . . . C. G. TT. C. . . . . G. . . . . C. . . . . C. AG T. CT. C. . . . . C. A. T. T. A. C. . . . . G. TT [960]  
*P. davyi* .G. TA. . . . . A . . . . . A. . . . . A. T. . . . . CCC. C. . . . . G. . . . . C. . . . . T T . . . . . G . . . . . C. C. . . . . T. . . . . AC. . . . . CA. . . . . A. C. . . . . AGGT. C [960]  
*P. parnellii* .G. TA. . . . . A . . . . . A. . . . . A. T. . . . . CTC. . . . . G. . . . . A. C. . . . . T T . . . . . G . . . . . C. C. . . . . T. . . . . C. . . . . CA. . . . . A. C. . . . . GT. C [960]  
*P. abramus* .G. G. . . . . G. G. A. C. TGA. . . . . G. . . . . C. . . . . T . . . . . A G. C. . . . . G. . . . . GG. . . . . T. TAG G. T. . . . . TG C. . . . . AGG. C GT. . . . . CCA. G . . . . . T. C. . . . . T. C. . . . . CC. GA. C. T. . . . . GG. TT. C [960]

mouse CTCCTTTACCA CCTATGATCG CCGCACCAAC ATCACCAGG AGCACTTCAG CCATCGGG-A GTTGCTAGGC CAACGCTATG GTAACC--AG CGTGGAGTGT ACCTGCTTA- CTAGCCACAG GACTGCCACA GCTGCCGAAG AGTTTGCTT CCTCATGACG [1120]  
*R. pearsonii* . . . . . C. . . . . C. A . . . . . T G. . . . . G. . . . . G. . . . . GCAC. . . . . C. . . . . G. . . . . C. CTC. . . . . A . . . . . G. . . . . C. . . . . C. A. . . . . G . . . . . C. G. . . . . A . . . . . [1120]  
*R. sinicus* . . . . . C. . . . . TGAC. . . . . T. . . . . T G. . . . . G. . . . . GCAC. . . . . C. . . . . G. A. . . . . C. CTC. . . . . A . . . . . G. . . . . C. . . . . TAG. . . . . C. C. A. . . . . G . . . . . TGAC. . . . . C. G. . . . . [1120]  
*R. pusillus* . . . . . C. . . . . T. TGAC. A . . . . . T G. . . . . G. . . . . CAC. . . . . C. . . . . G. . . . . C. CTC. . . . . CA . . . . . G. . . . . C. . . . . G. . . . . C. A. . . . . G . . . . . TGAC. . . . . C. G. . . . . [1120]  
*R. luctus* . . . . . C. . . . . TGAC. . . . . T. . . . . T G. . . . . G. G. . . . . CACA. . . . . C. . . . . G. A. . . . . G. . . . . C. CTC. . . . . A T. . . . . G. . . . . C. . . . . TAG. . . . . C. C. A. . . . . T . . . . . C. A. . . . . C. G. . . . . [1120]  
*H. armiger* . . . . . C. . . . . C. . . . . G. . . . . AGCACA. . . . . C. A. CT. . . . . TGG. AG. . . . . C. CTC. . . . . A . . . . . A. G. . . . . CC- . . . . . TAG. . . . . C. C. A. . . . . C . . . . . TGAC. . . . . C. G. . . . . [1120]  
*H. pratti* . . . . . C. . . . . C. . . . . G. . . . . AGCACA. . . . . C. A. CC. . . . . TGG. AG. . . . . CA CTC. . . . . A . . . . . A. G. . . . . C. . . . . TAG. . . . . C. C. A. . . . . C A. C. TGAC. . . . . C. G. . . . . [1120]  
*P. davyi* . . . . . C. . . . . T . . . . . G. CAT C. A. . . . . T. C. CA. . . . . C. . . . . G. . . . . GA. . . . . A. CTC. . . . . A . . . . . AGA. A. . . . . T. . . . . C. . . . . CA C. CA. . . . . A. T. G. . . . . TGA. . . . . TAA. . . . . [1120]  
*P. parnellii* . . . . . C. . . . . C. T . . . . . G. CAT C. A. . . . . T. C. CA. . . . . C. . . . . G. . . . . T. . . . . TC. . . . . A . . . . . GA. A. . . . . C. . . . . CA C. CA. . . . . GG . . . . . T. G. . . . . TGA. . . . . TAA. . . . . [1120]  
*P. abramus* . . . . . C. . . . . G. C. . . . . A . . . . . C. C. A. . . . . T. TCACA. C. . . . . CCTGGG. A A. GGAAGGG. . . . . CTTG. TG. . . . . CA. C. C. . . . . C . . . . . G. . . . . GGG. . . . . TA. . . . . C. A. A. . . . . G. . . . . CA. A. G. . . . . CA. T. . . . . C. CT [1120]

mouse TTCCTGGGCT GGGCCACACT GGTC--GGC GAAATCACCG CGGGTAGCCT GCTCCACACC TGCACGGTGC CACTGCTGGA CTCGCCCCAG GGTGGCCTGG CGCTCACAGT ACCGGTAC--TTACT TTTATTGACA ACCACGGTGA GGCTGGCTG [1280]  
*R. pearsonii* . . . . . A. . . . . G. . . . . G. . . . . C. . . . . G. . . . . C. . . . . C. . . . . C. . . . . GA. . . . . GG. A . . . . . C. . . . . C. . . . . G. T. G. . . . . C. C. . . . . T. G. . . . . TG. . . . . [1280]  
*R. sinicus* . . . . . A. . . . . G. . . . . G. . . . . G. . . . . C. . . . . G. . . . . C. . . . . C. . . . . GA. . . . . GG. A . . . . . C. . . . . C. . . . . G. T. G. . . . . C. C. . . . . T. G. . . . . TG. . . . . [1280]  
*R. pusillus* . . . . . A. . . . . G. . . . . G. . . . . TG. . . . . C. . . . . A. . . . . C. . . . . C. . . . . C. . . . . GA. C. GG. . . . . C. . . . . C. . . . . G. T. G. . . . . C. C. . . . . T. G. . . . . TG. . . . . [1280]  
*R. luctus* . . . . . A. . . . . G. . . . . G. . . . . G. . . . . C. C. . . . . G. . . . . A. . . . . C. . . . . GA. A. . . . . TGA. . . . . C. . . . . C. . . . . G. T. G. . . . . C. . . . . G. C. . . . . T. G. . . . . TG. . . . . [1280]  
*H. armiger* . . . . . A. . . . . T. . . . . G. . . . . A. ATG. T . . . . . G. . . . . TG. . . . . CT. . . . . G. A. . . . . CA. . . . . C. . . . . G. A. . . . . AG. A . . . . . CA. . . . . A. . . . . C. C G. . . . . G. . . . . C. C. . . . . T. G. . . . . TG. . . . . [1280]  
*H. pratti* . . . . . A. . . . . T. . . . . G. . . . . T GAG. . . . . TG. . . . . CT. . . . . A. A. . . . . CA. . . . . C. . . . . G. A. . . . . AG. A . . . . . CA. . . . . A. . . . . CAC G. . . . . G. . . . . C. C. . . . . T. G. . . . . TG. . . . . [1280]  
*P. davyi* . . . . . T. . . . . A. . . . . G. . . . . T--AG T . . . . . G. . . . . T. A. C. . . . . T. . . . . CA. T. . . . . A. . . . . C. . . . . GATAT. AG. . . . . A. T. C. . . . . A. . . . . TG. . . . . G. T. G. . . . . C. C. . . . . CA. . . . . T. A. . . . . TG. . . . . [1280]  
*P. parnellii* . . . . . T. . . . . A. . . . . GG. . . . . T--AG T . . . . . G. . . . . T. A. C. . . . . T. . . . . CA. T. . . . . C. . . . . G. A. AT. AG. . . . . A. . . . . A. . . . . TG. . . . . G. T. GT- . . . . . C. C. . . . . CA. . . . . T. A. . . . . TG. . . . . [1280]  
*P. abramus* . . . . . G. C. . . . . G. . . . . A . . . . . G. . . . . T. . . . . C. . . . . C. . . . . G. . . . . GA G. . . . . A. . . . . C. . . . . C. . . . . G. A. G. . . . . TGA. . . . . T. . . . . C. . . . . C. T. CT. AC CCTCA. C. GC A. C. CAG. . . . . TG. A. CA. . . . . TG. . . . . [1280]

mouse GGGGGTGGGG TGGTACC--- --TGATGCCA TCGTGCTGGC TG---AGGAG GCCTTAGAGA GAGCTCAGGA GGTGCTGGAC TTCCATCGCA GTCTGGGCGC CTTGGTAGAG GGCACGGGTC GCCTGCTGGA GGCTCACTAT GCCCGCCAG AGATCGACA [1440]  
*R. pearsonii* . . . . C . T . . . . G . --- -C . G . T . . . . . C . --- . . . . TC . GC . C . . . . C . . . . . C . G . . . . CT . . . . C . . . . G . . . . . TAG . A . . . . A . G . . . . . C . G . . . . A . A . . . . G . T . TCG . [1440]  
*R. sinicus* . T . . C . T . . . . G . --- -C . C . T . . . . . C . --- . . . . TC . GC . C . . . . C . . . . . A . G . . . . T . . . AC . . . G . . . . . A . . . . C . C . . . . A . . . . . G . T . TCGG [1440]  
*R. pusillus* . . . . C . T . . . . G . --- -C . G . T . . . . . C . --- . . . A . TC . GC . C . . . . C . . . . . A . G . . . . T . . . C . . G . . . . A . . . . AA . G . . . . C . . . . . A . . . . . GCT . TCGG [1440]  
*R. luctus* . . . . C . T . . . . G . --- -C . --- T . . . . . C . C . --- T . TC . GC . C . . . . C . . . . . A . A . CT . . . C . G . . . . C . A . . . . A . G . . . . CT . . . . A . A . . . . G . T . TCGG [1440]  
*H. armiger* . . . . TC . --- - . . . . . . . . . . . . . . . G . CGG . . . . T . G . C . . . . C . . . . A . . . . A . G . . . . C . . . . CT . . . A . . . . CA . A . . . . A . G . . . . A . C . . . . AT . . . . G . T . TCGG [1440]  
*H. pratti* . . . . TC . T . . . . G . --- -C . C . . . . . . . . . . G . CAG . . . . T . G . C . . . . C . . . . A . . . . A . G . . . . C . . . . CT . . . A . . . . CA . A . . . . A . G . . . . A . C . . . . AT . . . . G . T . TCGG [1440]  
*P. davyi* . . . . . . . . . . G . ATG CATAA . . . . T . CT . . . . TG---A . . . . C . G . C . T . . . . C . . . . A . T . . . . G . . . . C . A . . . . GA . . . . . . . . . . A . AT . A . . . . A . . . . C . . . . G . . . . A . A . . . . G . T . TTGG [1440]  
*P. parnellii* . . . . . . . . . . G . ATG CCTAA . . . . T . CT . . . . CA . . . . TG---A . . . . C . G . GC . T . . . . C . . . . A . T . C . . G . . . . C . A . . . . GA . . . . . . . . . . T . A . AT . . . . . . . . . . C . . . . G . . . . A . A . . . . G . T . TTGG [1440]  
*P. abramus* E ACCA . C . A . CG . --- - E . . . . . . . . . . G . . . . CA --- . . . . AC . G . C . G . C . . . . E . . . . TA . . . . G . C . GG . C . . . . A E T . . . . C . TAG . . . . . . . . . . E T . . . . E --- E . . . . E . . . . A . A . . . . TAG A GCT . TCG [1440]

mouse GCGGGCCAGA GCTCTCTGC AATCTAAGTT GCCCAAGGA G---CCTACCG CACAGC--- --TGTTGAC TTGGAGTAC TGGCCTCACA GCTCACTGCT GACCTTCAGG AGGTATC---TGAGGACCA CCGCCTGCTGT GTATTCCATA GCCCTGGGGA [1600]  
*R. pearsonii* . AA . A . AGTC . AC . G . T . G . G . CG . C . . . . G . G . . . . . . . . . . C . . . . . . . . . . C . . . . C . C . . . . T . . . . . A . . . . . G . A E . . . . A . G . . . . --- - . G . . . . T . . . . T . A . . . . G . . . . C . . . . TG . C . . [1600]  
*R. sinicus* . AA . A . AGCC . AC . G . T . G . G . C . C . . . . G . G . . . . . . . . . . --- -C . . . . C . . . . C . C . . . . T . . . . . A . . . . TAG . G . A . . . . A . G . . . . --- - . G . . . . T . . . . T . A . . . . G . . . . C . . . . TGA [1600]  
*R. pusillus* . AA . A . AGCC . AC . G . T . G . G . C . C . . . . G . G . . . . . . . . . . --- -C . . . . C . . . . C . C . . . . T . . . . . A . . . . TAG . G . A . . . . A . G . . . . --- -TAG . T . . . . T . A . A . . . . G . . . . C . . . . C . . [1600]  
*R. luctus* . AA . A . AGCC . AG . G . TG . G . G . C . C . . . . G . G . . . . . . . . . . A . . . . --- -C . . . . C . . . . C . C . . . . T . . . . . A . . . . TAG . G . A . . . . A . G . . . . --- - . G . . . . T . . . . T . A . . . . G . . . . CG . . . . C . . [1600]  
*H. armiger* . AA . A . AGC . AC . G . T . G . A . C . C . . . . G . G . . . . . . . . . . --- -C . . . . C . . . . C . C . . . . C . . . . . C . . . . A . . . . A . G . . . . --- - . G . . . . TG . T . . . . . . . . . . C . . . . C . CA . [1600]  
*H. pratti* . AA . A . AGC . AC . CG . T . G . A . C . C . . . . G . G . . . . . . . . . . --- -C . . . . C . . . . C . C . . . . C . . . . . C . . . . TAG . A . . . . A . G . . . . --- - . G . . . . TG . T . . . . . . . . . . C . . . . C . CA . [1600]  
*P. davyi* . T . A . AG . AC E G . AT TGA G . C . C . C . G . G . . . . T . T . C . CATG GCCC . . . . C . . . . C . . . . TG . C . . . . CA . C . . . . G . . . . A . G . . . . --- - . G . . . . T . TT . T . . . . G . G . C . . . . TAG [1600]  
*P. parnellii* . A . A . AGA . AC . G . AT . G . G . C . . . . CA . . . . G . G . . . . T . . . . C . . . . --- -C . . . . C . . . . C . . . . C . . . . G . C . . . . G . . . . A . G . . . . --- - . G . . . . TCT . T . . . . G . . . . C . . . . TAGTGA [1600]  
*P. abramus* . A . TAG . . ACT . G . AT . G . G . C . AGC . TAGAGA . G GC . . . . A . . . . --- -CA . . . . C . C . . . CT . G . T . C . . . . G . . . . G . CA . . . . G . CAT C . G . . . . TGCT . . . . GC . G . E --- E [1600]

mouse GCTTGTGGCA GAGGAGTCC CTCTACGCC C---CCTGCGT TCCTCCTCCA GAGGAACTCT CCTATCTCAT AGAGGCTCTG TTCAAAACGG ATGTGCTACC CGGCCAGCTC GGCTACTTGC GTTTTGACGC CATGGCTGAG CTAGAGACAG TAAAGCCAT [1760]  
*R. pearsonii* . . . G . CA . . . . . . . . . . G . C . C . A . . . . T . GTT . . . . . G . T . . . . C . . . . C . . . . C . T . . . . G . A . . . . G . . . . G . A . . . . G . . . . TAG . . . . . C . A . . . . G . . . . G . . . . [1760]  
*R. sinicus* . . . G . CA . . . . . . . . . . G . C . C . A . . . . T . GTT . . . . . G . T . . . . C . . . . C . . . . C . T . . . . G . A . . . . G . . . . G . A . . . . G . . . . TAG . . . . . C . . . . G . . . . G . . . . [1760]  
*R. pusillus* . . . G . CA . . . . . . . . . . G . C . C . A . A . . . . T . GTT . . . . . G . T . . . . C . . . . C . . . . C . T . . . . G . A . . . . G . . . . G . A . . . . G . . . . TAG . T . . . . C . . . . G . . . . G . . . . [1760]  
*R. luctus* . . . G . CA . . . . . . . . . . C . . . . G . C . C . GA . T . . . . T . GTT . . . . . G . . . . . . . . . . C . . . . C . . . . TC . T . . . . G . A . . . . AA . . . . G . A . . . . G . . . . . A . . . . TAG . . . . TAG . . . . G . . . . G . . . . [1760]  
*H. armiger* . . . GACCA . . . . . . . . . . G . . . . C . . . A . T C TAGAT . . . . . G . . . . . . . . . . C . . . . C . . . . T . C . T . . . . GG . A . . . . G . . . . C . . . . CA . G . . . . G . . . . CCA . A . . . . C . . . . G . . . . AG . G . T . [1760]  
*H. pratti* . . . GACCA . . . . . . . . . . G . . . . A . T T AT . . . . GTT . . . . . G . . . . . . . . . . C . . . . C . . . . T . C . T . . . . G . A . . . . G . . . . C . . . . G . G . . . . CC . A . . . . CA . . . . G . . . . AG . TAGAT . [1760]  
*P. davyi* . . . G . . . . . . . . . . G . C . E A . . . . A . TT . T . . . . T . . . . . . . . . . CT . C T . . . . C . . . . TAG . G . TAG . GGA . . . . G . T . TG . G . . . . T . . . . T . G . . . . C . . . . G . . . . TAA A . . . [1760]  
*P. parnellii* T . G . . . . . . . . . . C . C . A . . . . A . TT . T . . . . T . . . . . . . . . . CT . C TAG A . C . . . . G . G . TA . GGA . . . . G . T . . . . G . . . . T . . . . TAGAT . G . . . . G . . . . G . . . . A . . . . [1760]  
*P. abramus* E --- E . . . . AG . C . E T T TAG . C . . . . TC . T . . . . GAA --- C . . . . C . . . . CAG . E C . . . . G . GA . . . . G . . . . CGT . E A . G . G . . . . TG . G . C . TAGAT . . . . A . TAG . . . . GA . . . . CA . G . . . . E [1760]

mouse TGGCCTCAG CTAGTACAGC TGTTGTGGCA GAGGCTGGTG GACACAGCTG CGC-TGATTG TTGACCTGCG CTACAACCTT GGCAGCTACT CTTCTGCCGT TCCTTACTC TGCTCTATT TTTTGGAGGC GGAGCCCCG CAGCACCTCT ACTCTGTTTT [1920]  
*R. pearsonii* . . . . A . . . . G . . . . . . . . . . G . . . . . . . . . . A . - . G . CA TAG . . . . . . . . . . TAG . . . . . CA . A . T . G . C . G . . . . . C . . . . TAGAT . T . . . . . . . . . . C . . . . [1920]  
*R. sinicus* . . . . A . . . . G . . . . . . . . . . G . . . . . . . . . . CA A . - . G . CA TAG . . . . . . . . . . TAG . . . . . CATA . T . G . C . G . . . . . C . . . . TAGAT . T . . . . T . . . . . . . . . . C . . . . [1920]  
*R. pusillus* . . . . G . . . . G . . . . . . . . . . G . . . . . . . . . . A . - . G . CA TAG . . . . . . . . . . TAG . . . . . CA . A . T . G . C . G . . . . . C . . . . TAGAT . T . . . . . . . . . . C . . . . [1920]  
*R. luctus* . . . . A . . . . G . . . . . . . . . . G . . . . . . . . . . C . TA . - . G . CA TAGAT . . . . T . . . . . . . . . . TAG . . . . . T . CA . A . T . G . C . G . . . . . C . . . . TAGAT . T . . . . T . . . . [1920]  
*H. armiger* . T . . A . . . . G . . . . . . . . . . G . . . . G . - . G . G . TAG . . . . . . . . . . CA . G . TA . G . C . G . . . . . C . . . . E T . . . . . . . . . . T . . . . T . . . . C . [1920]  
*H. pratti* . T . . A . . . . G . . . . . . . . . . G . . . . G . - . G . G . C . . . . . . . . . . CA . G . TA . G . C . G . . . . . C . . . . TAGAT . . . . . . . . . . T . . . . T . . . . C . [1920]  
*P. davyi* . . . . A . . . . G . G . . . . . . . . . . . . . . G . T . . . . AG - . T . . . . T . A . . . . T . . . . . . . . . . CATG . T . G . C . G . . . . . C . C . . . . T . A . A . TA . E --- E . . . . C . [1920]  
*P. parnellii* . . . . TA . . . . G . G . . . . . . . . . . A . . . . GT . G . . . . E G . . . . TG . . . . . T . . . . . . . . . . CA . G . T . G . C . G . . . . . C . C . . . . T . A . . . . A . . . . E --- E . . . . C . [1920]  
*P. abramus* C . . . . A . . . . G . CG . . . . . . . . . . . . . . GGA . C . GC . AC . C . G . C . TT . T . G . . . . . . . . . . CA . G . G . G . C . G . . . . E . C . C . . . . G . . . . T . A . . . . E --- E [1920]

mouse TGACAGGGCG ACATCTAGGG TCACAGAAAT ATGGACCCTG CCGCTGGTTG CTGGGCAACG CTATGGA [1987]  
*R. pearsonii* . . C . . . . T . . . . C . G . . . . GA . GG . G . . . . C . A . . . . G . . . . C . G . . . . C [1987]  
*R. sinicus* TAG . . . . C . TC . G . . . . GA . GG . G . . . . C . A . . . . G . . . . C . G . . . . CA . C [1987]  
*R. pusillus* TAG . . . . C . C . G . . . . GA . GG . G . . . . C . A . . . . G . . . . C . G . . . . C . C [1987]  
*R. luctus* TAG . . . . C . C . G . . . . TGA . GG . G . . . . G . . . . C . A . . . . G . . . . C . GT . . . . C . C [1987]  
*H. armiger* . . . . ATC . C . A . T . . . . GG . G . . . . C . A . . . . GA . . . . A . G . A . . . . C [1987]  
*H. pratti* TAG . . . . ATC . C . A . . . . GG . G . . . . C . A . . . . GA . . . . A . G . A . . . . C [1987]  
*P. davyi* TAG . . . . C . C . TG . T . . . . TG . GG . . . . C . A . C . G . . . . T . GG . . . . TAGC [1987]  
*P. parnellii* . . . . C . TC . G . T . --- - GG . . . . T . . . . C . A . C . G . . . . T . G . . . . A . C [1987]  
*P. abramus* E . . . . TC . C . GG . . . . . . . . . . GG . GCA E . . . . C . A . . . . GGC . C . T . G . A . TAG . CC [1987]

Deletions

Insertions

Premature stop codons
