# Supplementary material for: Independent Losses of Visual Perception Genes Gja10 and Rbp3 in Echolocating Bats (Order: Chiroptera)
Source: PubMed Central journal article supplement (PMC3715546; doi:10.1371/journal.pone.0068867), 2013-07-18
Supplement: pone.0068867.s005.pdf [file pone.0068867.s005.pdf]

|                                |            |            |            |            |            |            |            |            |            |
|--------------------------------|------------|------------|------------|------------|------------|------------|------------|------------|------------|
|                                | 1112222222 | 2222222222 | 2222233333 | 3333333333 | 3333333333 | 3333333333 | 4444444444 | 4444444444 | 4444444444 |
|                                | 9990111234 | 4445555667 | 7899900222 | 3333344455 | 5556667778 | 8999999999 | 0000000011 | 1111224445 | 5555667778 |
|                                | 3496567332 | 3490348053 | 5813527458 | 0125823923 | 5790191486 | 9013456789 | 1345678901 | 2568124892 | 3578080480 |
| mouse                          | VMVTEVLAGI | AYMRIVREDQ | NPGGTLTRAG | VLREQTLGHH | AMYSAVKAAL | ATGRDSSSRP | TPNESPAATP | ETEDRARAAE | TGYVKDEMHP |
| <i>Rousettus leschenaultii</i> | ILITQVLAGI | AYMRIVRVDQ | DPGSTLTRAG | MRREQTLAHH | AMFAAVKAAL | AIRRETSSGP | AADYPPEVVP | AEDVQARASG | AGYIHDEMQP |
| <i>Eonycteris spelaea</i>      | ILITQVLAGI | AYMRIVRVDQ | DPGSTLTRAG | MRREQTLAHH | AMFAAVKAAL | AIRRETSSGP | AADYLPEVVP | AEDVQARASG | AGYIHGEMQP |
| <i>Cynopterus sphinx</i>       | ILITQVLAGI | AYMRIVRIDQ | DPGSTLTRAG | MRHEQTLAHH | AMFAAVKAAL | AIRRETSSGP | ATDYLPEVVP | AEDVQARASG | EGYIHDEMQP |
| <i>Megaderma lyra</i>          | ILIMQILAGI | TYMRIVRVDQ | DTGSTLTKAG | LQREQTLAQH | AMFTAVKTAM | AVRKETSSGR | ATNDPPEVAP | AEDVQTRASE | VGHIRDDMQP |
| <i>Megaderma spasma</i>        | ILIVQILAGI | TYMRIVRVDQ | DPGSTLTKAG | LQREQTLAQH | AMFTAVKTD  | AIGKETSSGR | ATNDPPEVAP | AEDVQTRASE | AGHIRDDMQP |
| <i>Emballonura raffrayana</i>  | VLITQVPVAM | AHMRIVQVEQ | DPRSVPTRSG | VRRGRTRAHR | ATFSTVQAAL | VIRKEASPGP | AADDLPEATR | AEDAQGSSEG | AGYIRDEMQP |
| <i>Mormoops megalophylla</i>   | VLITQVLAAI | AYMHTVWVDQ | DPGSMLTRAE | MWHEQTLAHH | IMFSMIKAAL | PIRKETSSRP | AADDLREVG  | AEDVQARASG | TSYIRDELQT |
| <i>Artibeus jamaicensis</i>    | VLITQVLAGI | AYKRTIRMDH | DPGSTLIRAE | MRHEQTLAHH | AMFTMIKAAL | PIRKETSSGP | AADDLPEVAP | TEDVQARAPG | ASYIRDELQT |
| <i>Tadarida brasiliensis</i>   | VLVTQVPAAI | AHMRIVQVEQ | DPRSVPTRAG | VRREQARAHH | ATFSTVKTAL | VLRKETSPGP | AADDPPEATP | AEDAQASVSG | AGCIRDEMQP |
|                                | 4444444555 | 5555555555 | 5555555555 | 5566666666 | 6666666666 | 6667777777 | 7777777778 | 8888888888 | 8          |
|                                | 8889999011 | 2223355577 | 7778888888 | 8902223344 | 4555555666 | 7990111123 | 4466677890 | 0011122233 | 3          |
|                                | 5790689046 | 1271208904 | 5681234568 | 9932392302 | 3456789034 | 8137138915 | 0115927960 | 4507916701 | 3          |
| mouse                          | SMLVGEAGIQ | HRQNQFGWST | CTPDSPPQGA | LNAERDRSGG | RIAQRARAQS | EVEVVLVPPD | QLQLRDISSE | RQVRTILVQR | G          |
| <i>Rousettus leschenaultii</i> | SVLLGDSGVQ | RTQSQLGWST | HTSETPESGV | LNCDKERSGG | RVVGQTGDRA | DMGAVPIFPE | QLQLKDVTS  | RQVRTVQVQR | G          |
| <i>Eonycteris spelaea</i>      | SVLLGDSGVQ | RTQSQLGWST | HTPETPESGV | LNCDKERSGG | HVVEQTGDRA | DMGAVPIFPE | QLQLKDVTS  | RQVRTVQVQR | G          |
| <i>Cynopterus sphinx</i>       | SVLLGDSSVQ | RTQSQLGWST | HTPETPESGV | LNCDKERSGG | RVVGQIGDRA | DMGVVPIFPE | QLQLKDVSS  | RQVRTVQVQR | G          |
| <i>Megaderma lyra</i>          | SVLLGDTGVQ | RTQSQLSWST | CTPETPEGSV | LNCDRECNGG | RVVGQTGDRA | DMGAVPIFPE | QLQLGDVTS  | RQVRTVQVQS | G          |
| <i>Megaderma spasma</i>        | PVILGDTGVQ | RTQSQLSWST | CMPDTLEGSV | LNCDRECNGG | RVVGQTGDRA | DMGAVLIFHE | QLQLGVVTT  | RQIRTVQVQS | G          |
| <i>Emballonura raffrayana</i>  | SVLLSGASVQ | RTPAQLGWSS | HAPETPDGGE | LNCDRERGGG | RVVMQTGDQA | EMGTVPVSPE | RVQRRDVTSE | RQVNTVQVQR | G          |
| <i>Mormoops megalophylla</i>   | SVLLGEASVR | CMQSQLGWNT | HTPVTAEGGA | FNCEKERRDG | HVVGRTGDRA | EMGEMPVFPE | QLQLRDVTSE | LQVTMVQLQR | S          |
| <i>Artibeus jamaicensis</i>    | SVLLGEASVQ | CTQSHLGWST | HTPDTPEGGA | LDCDKERSGG | RVVGRTGDRA | EMGALPIFPE | PLQMRDVTSE | LQVTTVQLQR | S          |
| <i>Tadarida brasiliensis</i>   | SVLLSGASVQ | RTPSQLGRST | HTPKTPEGGA | LNCDRERSGG | RVVGQIGDQA | EMGAVPVFPE | RLKLRDVESE | RRVRTVQVRR | G          |
